# Supplementary material for: Dereplication of Natural Products with Antimicrobial and Anticancer Activity from Brazilian Cyanobacteria
Source: MDPI journal article supplement (doi:10.3390/toxins12010012), 2019-12-24
Supplement: s1 [file s1]

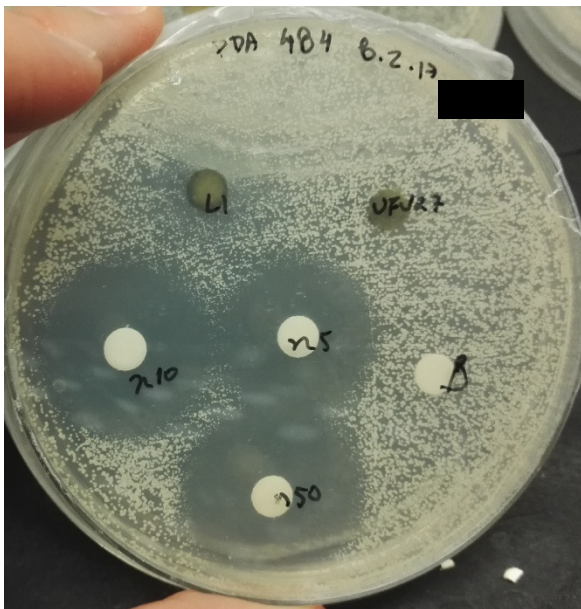

UFV-L1, UFV-27, Positive Controls, Negative Control

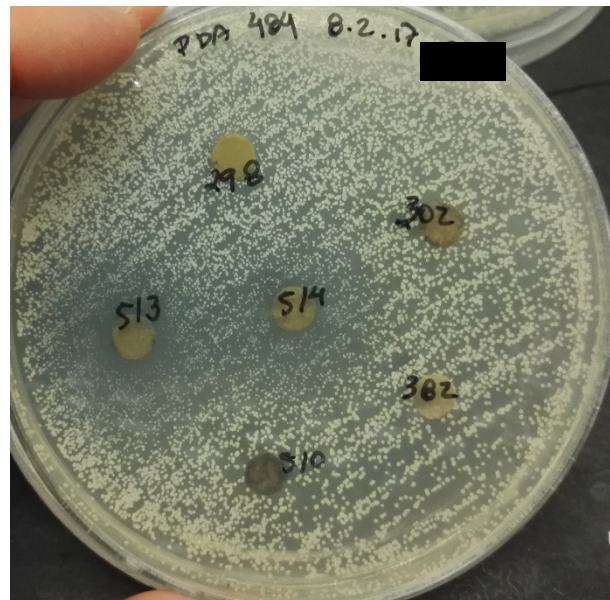

CENA298, CENA302, CENA513, CENA514, CENA382, CENA510

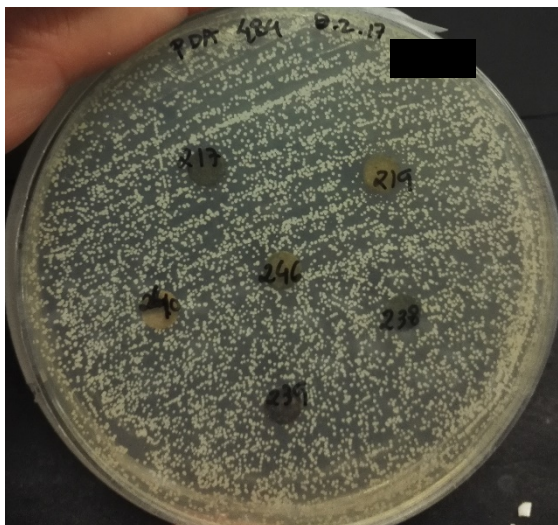

CENA217, CENA219, CENA240, CENA246, CENA238, CENA239

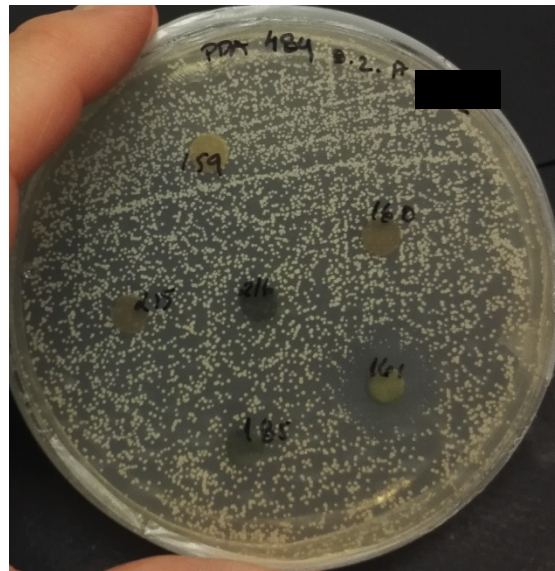

CENA159, CENA160, CENA215, CENA216, CENA161, CENA185

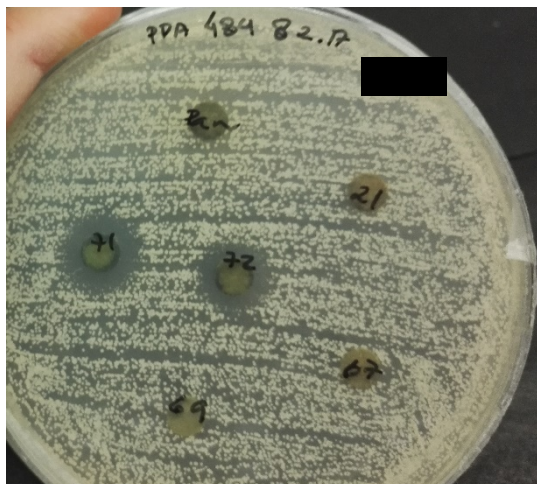

CCIBt3594, CENA21, CENA71, CENA72, CENA67, CENA69



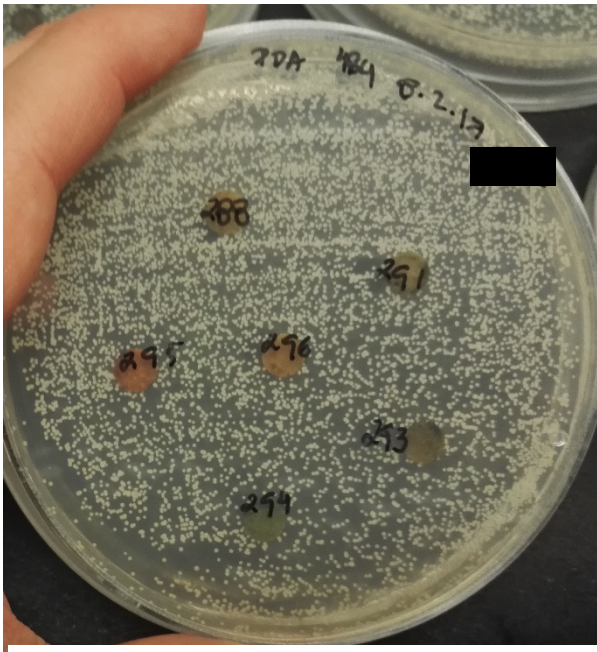

CENA288, CENA291, CENA295, CENA296, CENA293, CENA294

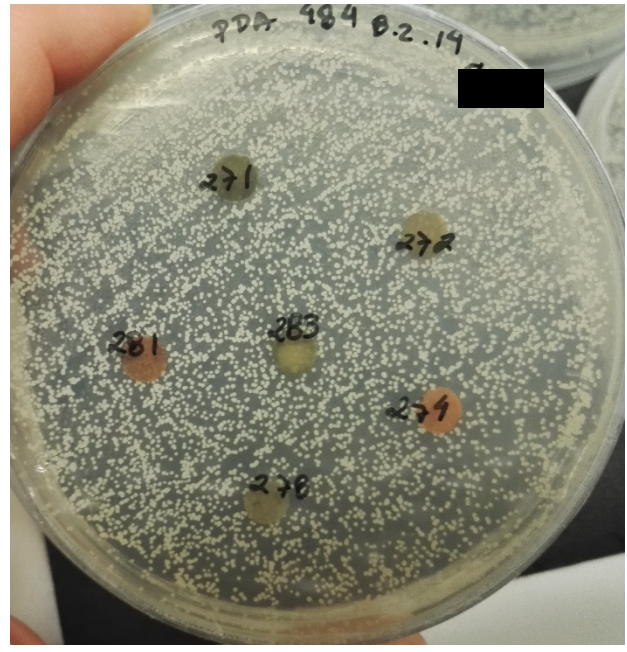

CENA271, CENA272, CENA281, CENA283, CENA274, CENA278

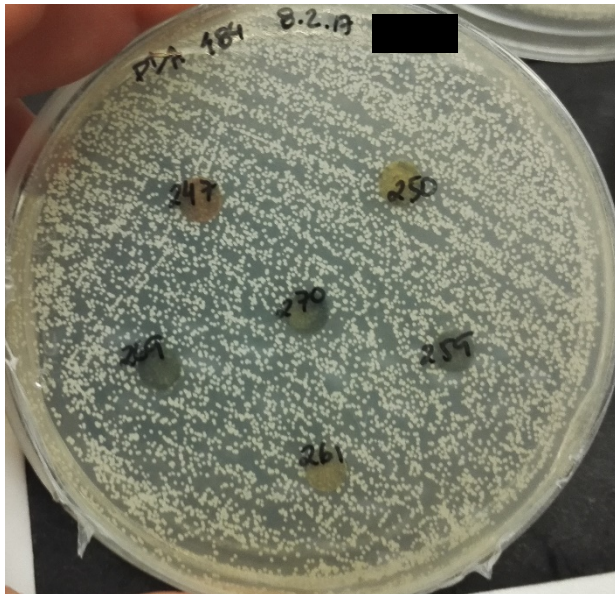

CENA247, CENA250, CENA269, CENA270, CENA259, CENA261

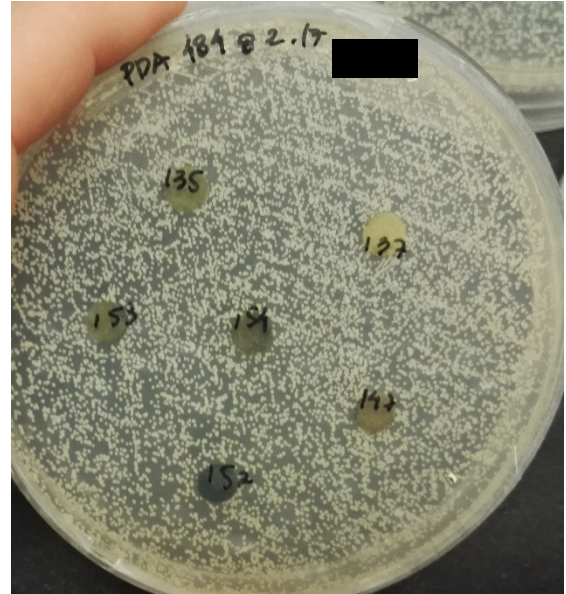

CENA135, CENA137, CENA153, CENA154, CENA147, CENA152

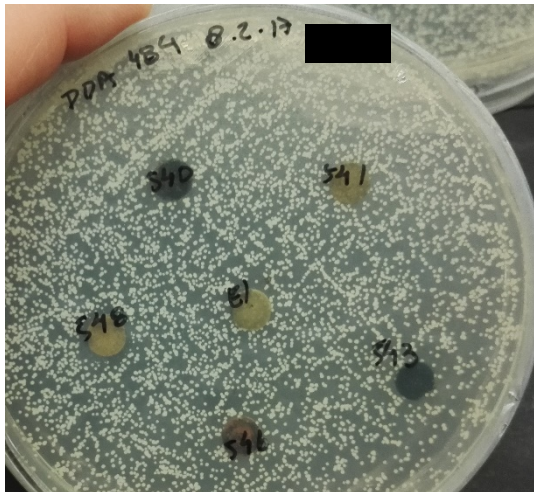

CENA540, CENA541, CENA548, UFV-E1, CENA513, CENA543

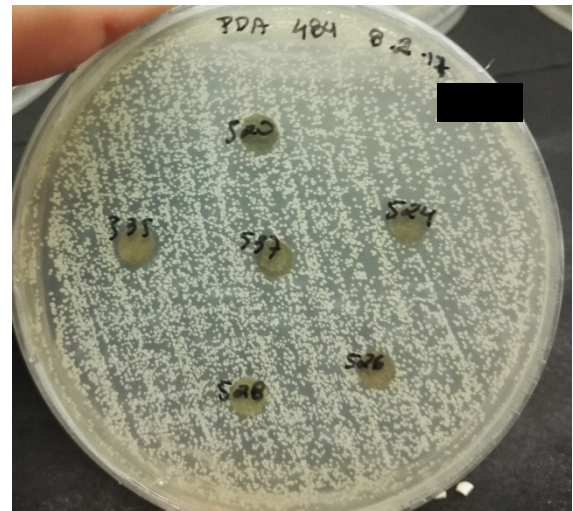

CENA520, CENA535, CENA537, CENA524, CENA528, CENA526
