# Supplementary figures and images for: Dereplication of Natural Products with Antimicrobial and Anticancer Activity from Brazilian Cyanobacteria
Source: MDPI journal article supplement (doi:10.3390/toxins12010012), 2019-12-24

## *Fischerella* sp. CENA72

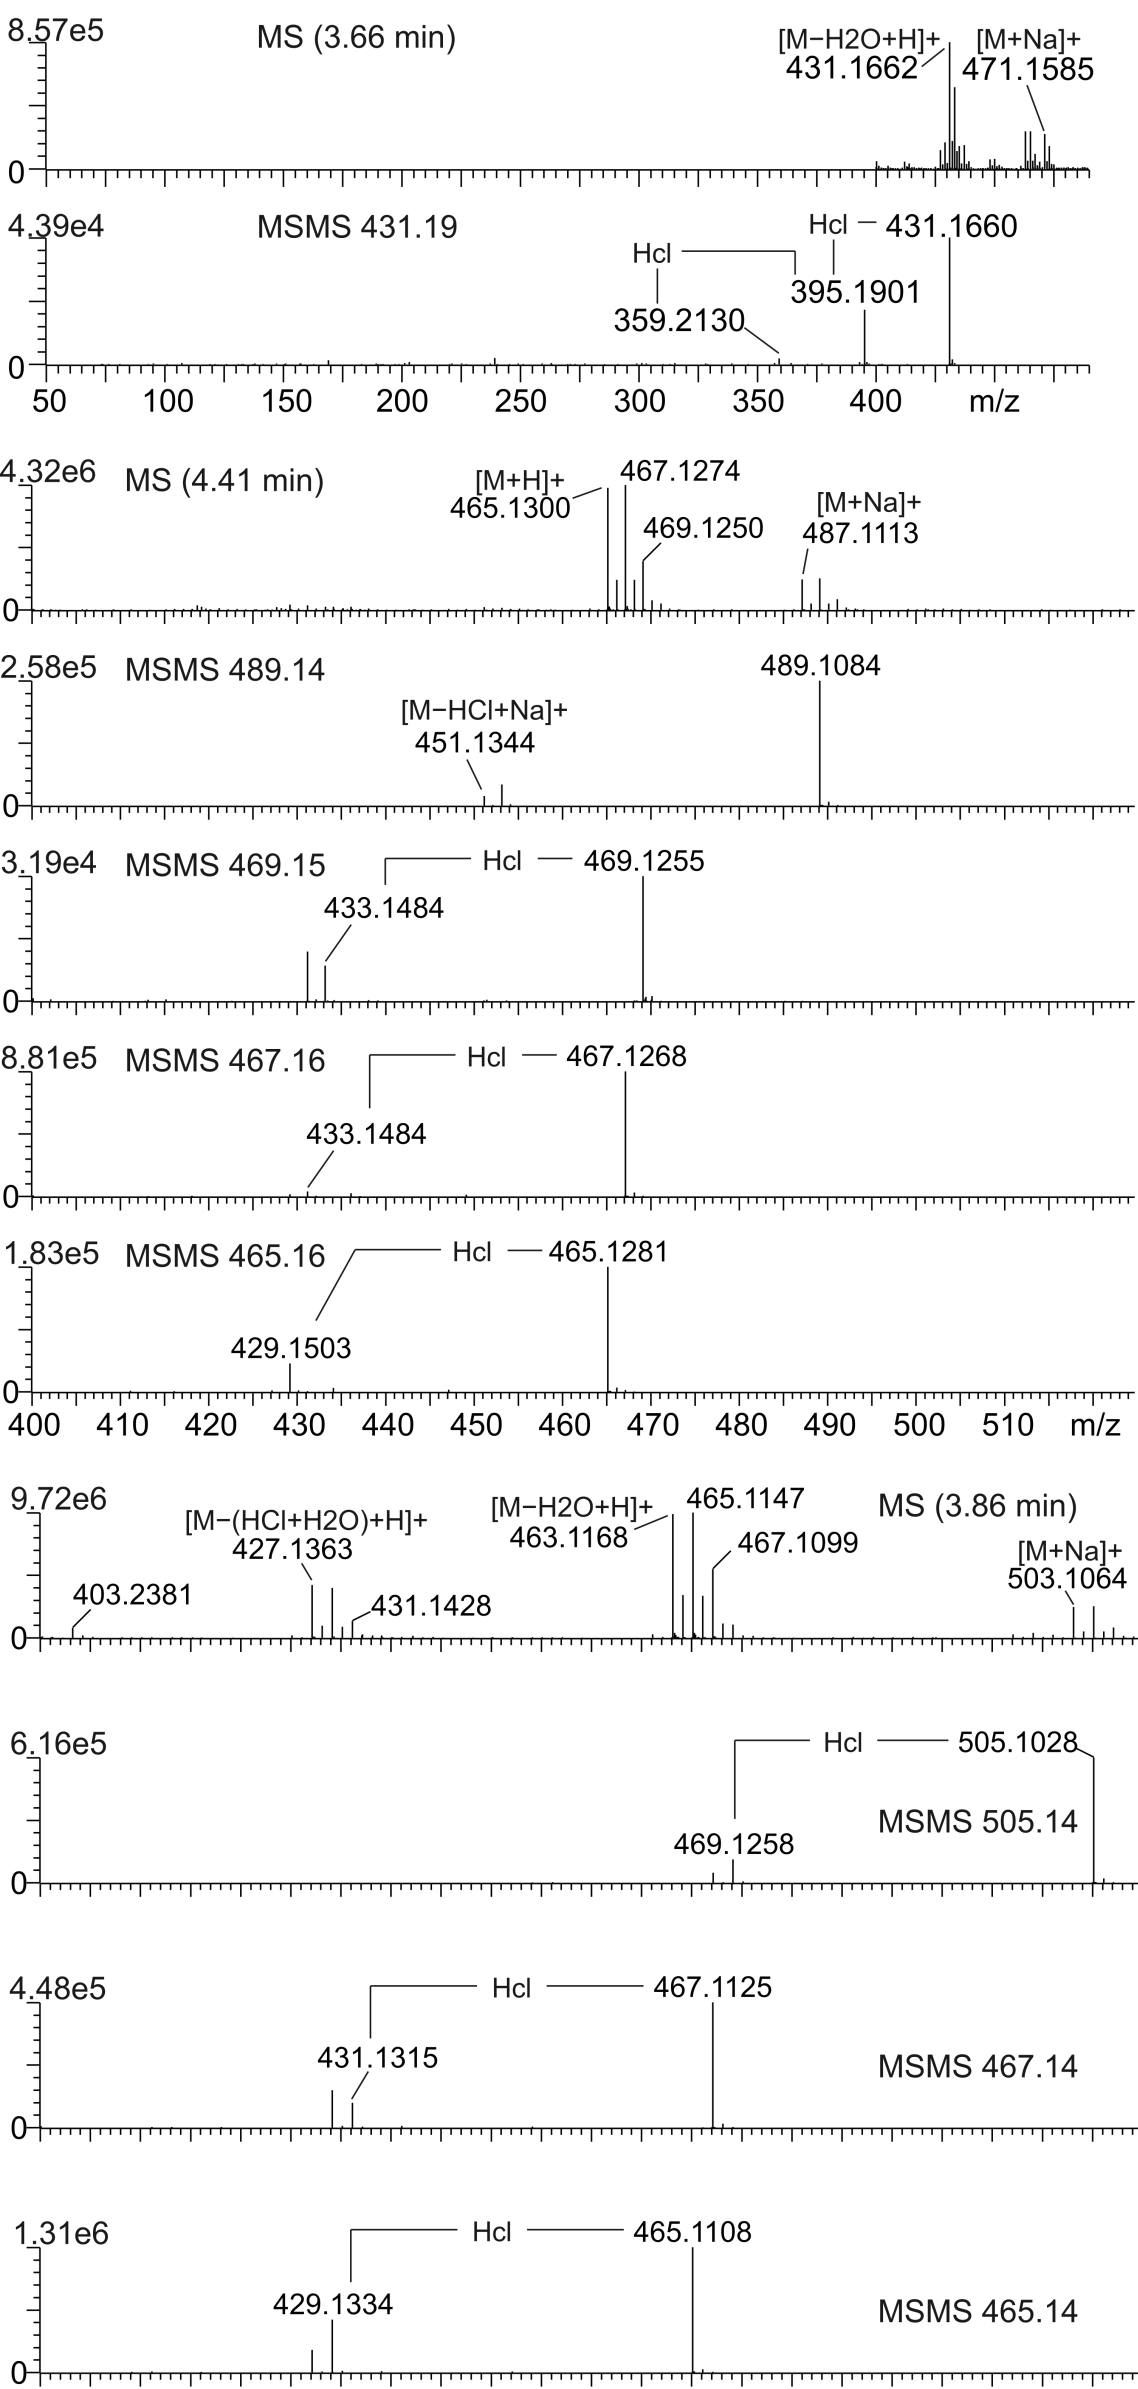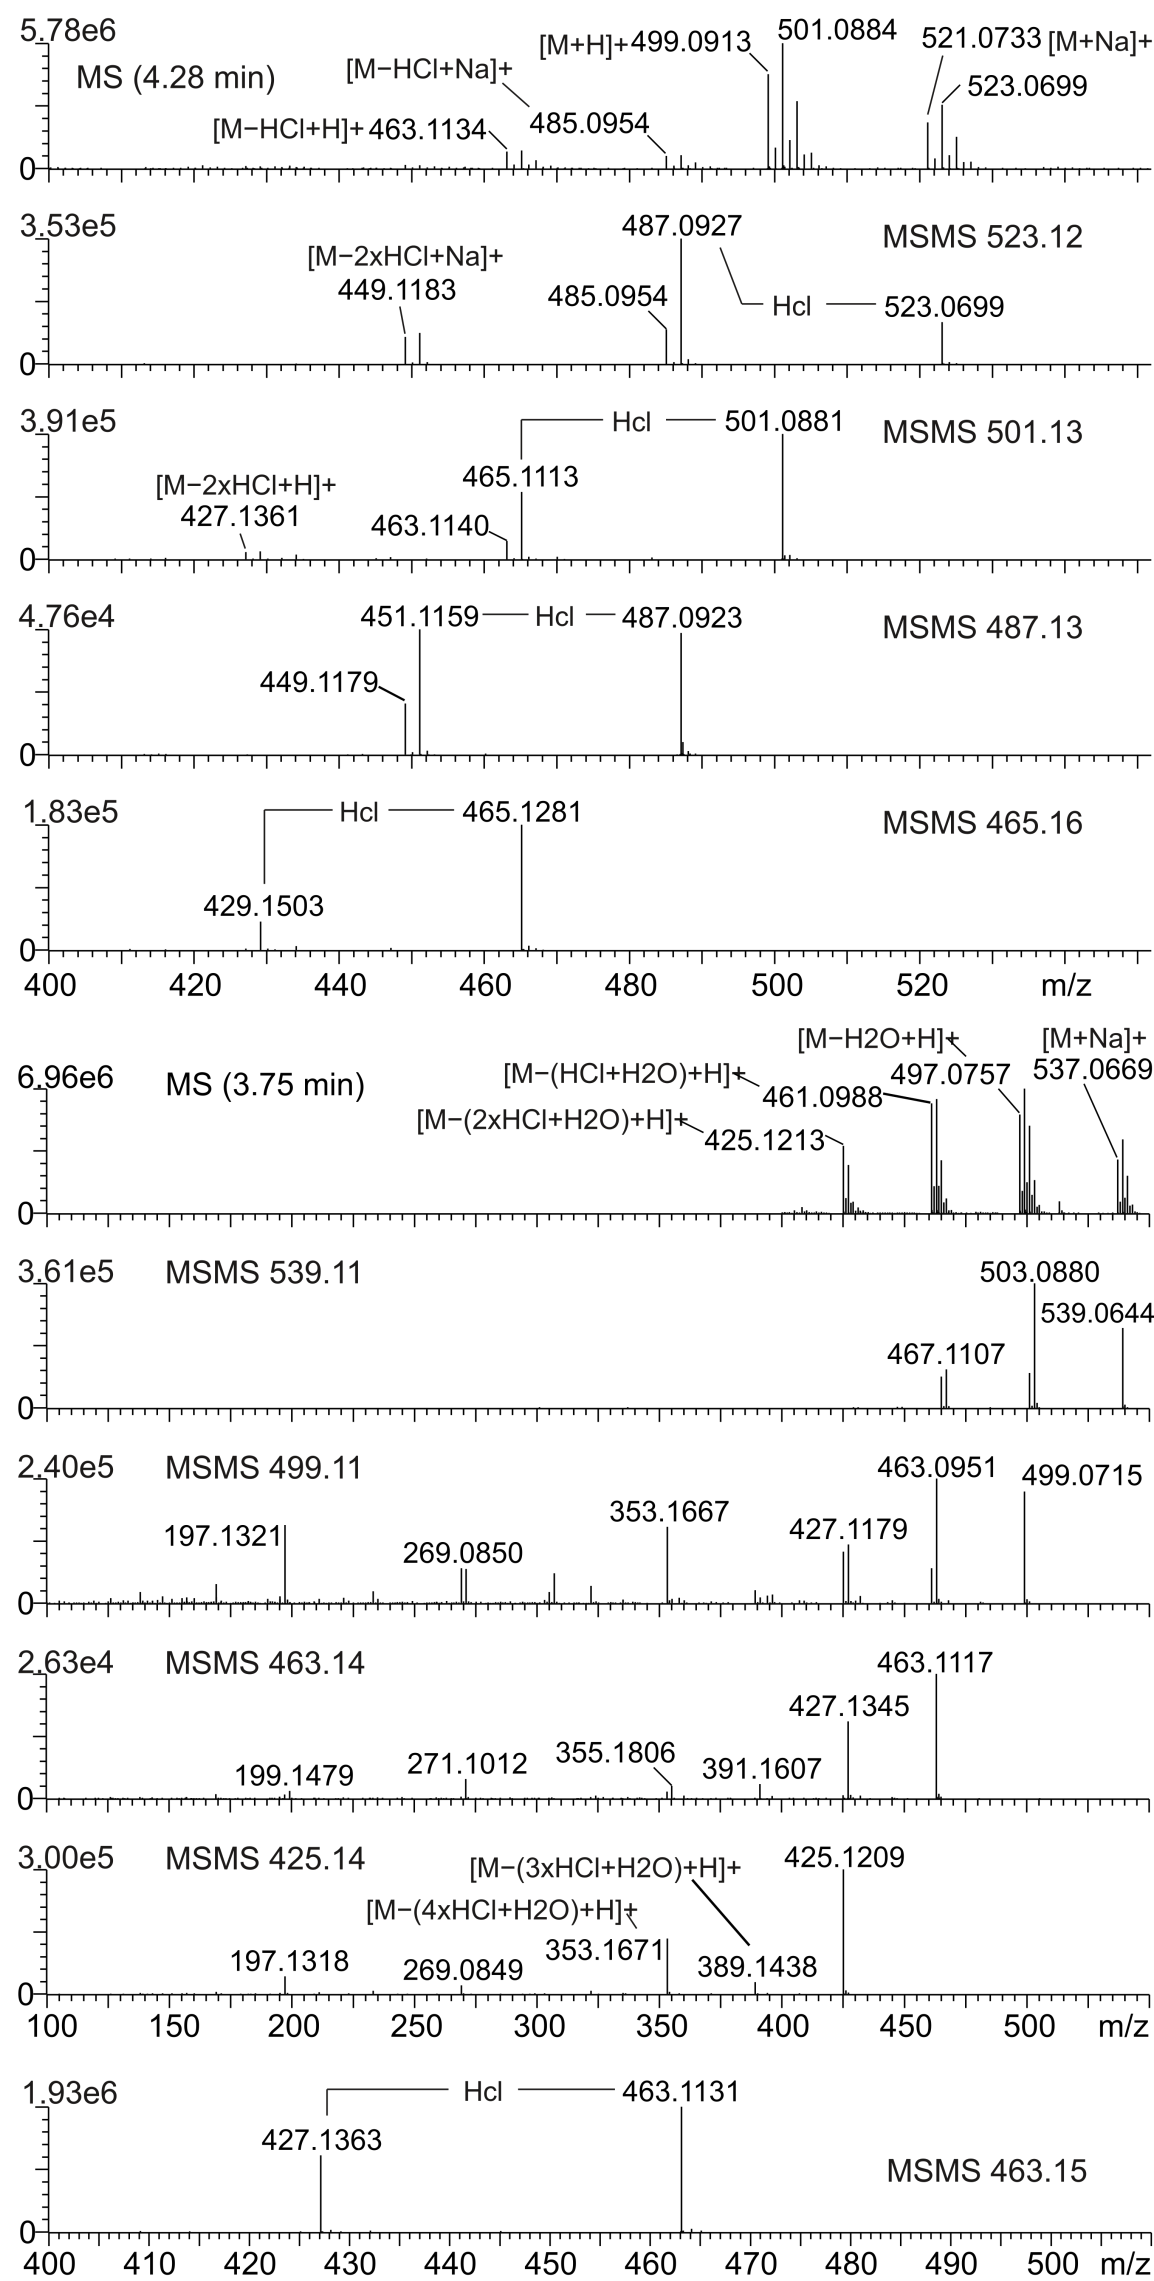

## *Nostoc* sp. CENA69

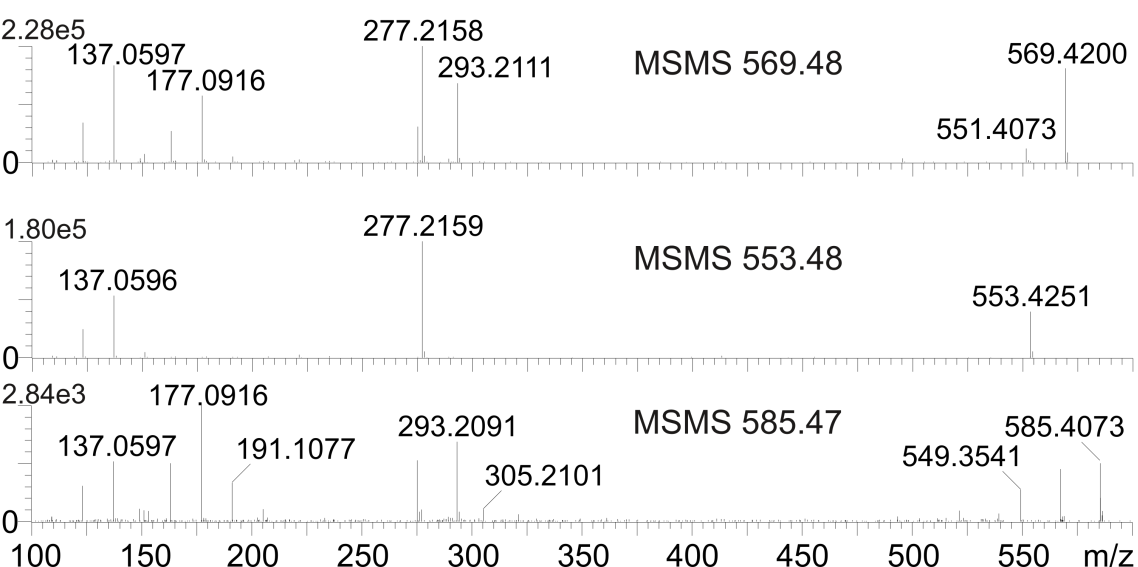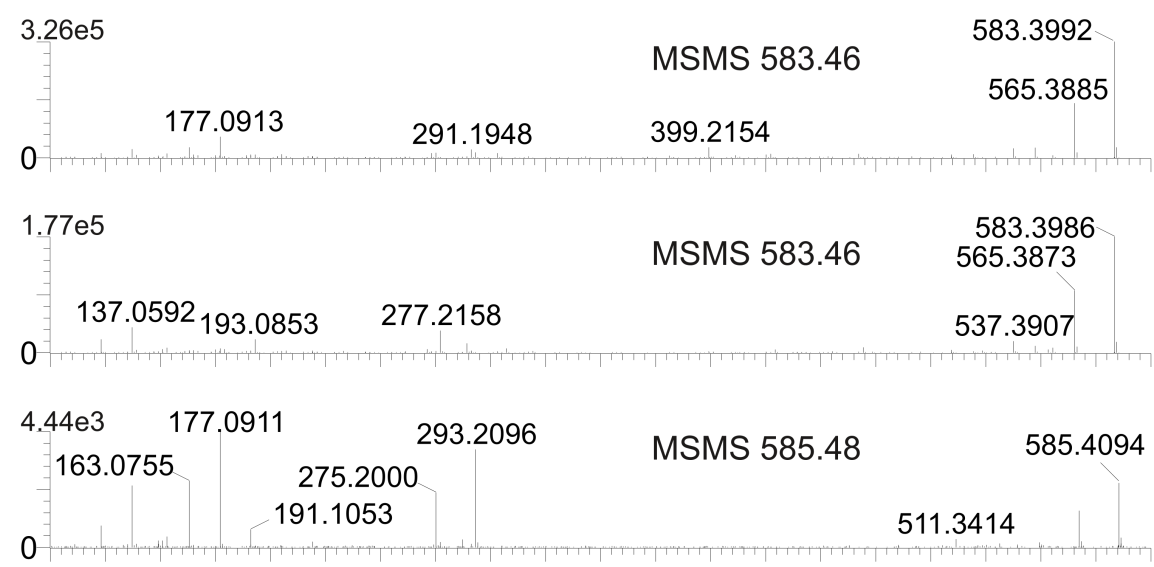

Supplement: s1 [file s1]

# *Aliinostoc* sp. CENA535

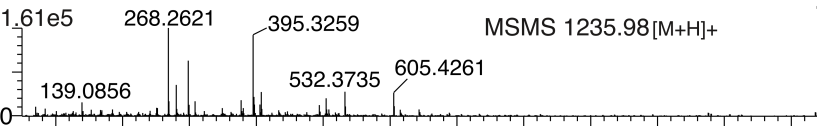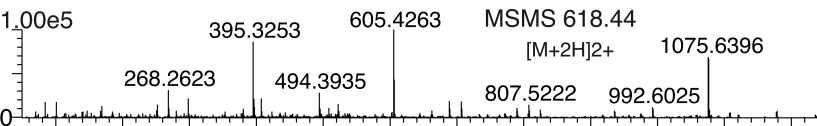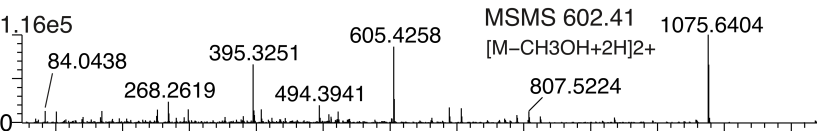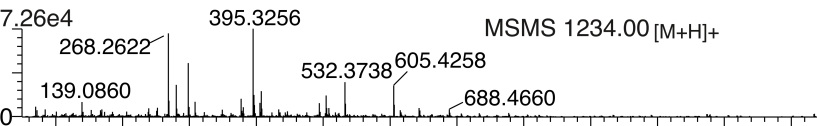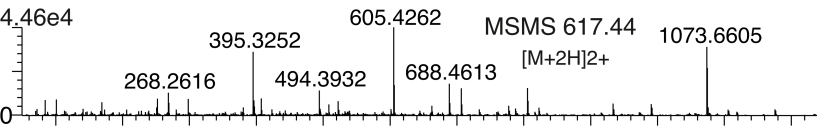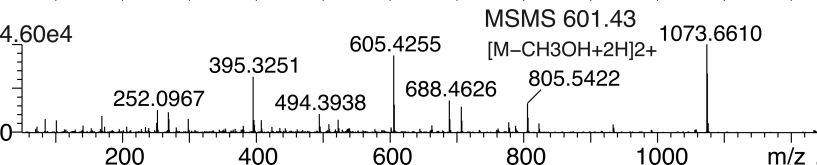

Puwainaphycin A

Puwainaphycin B

Supplement: s1 [file s1]

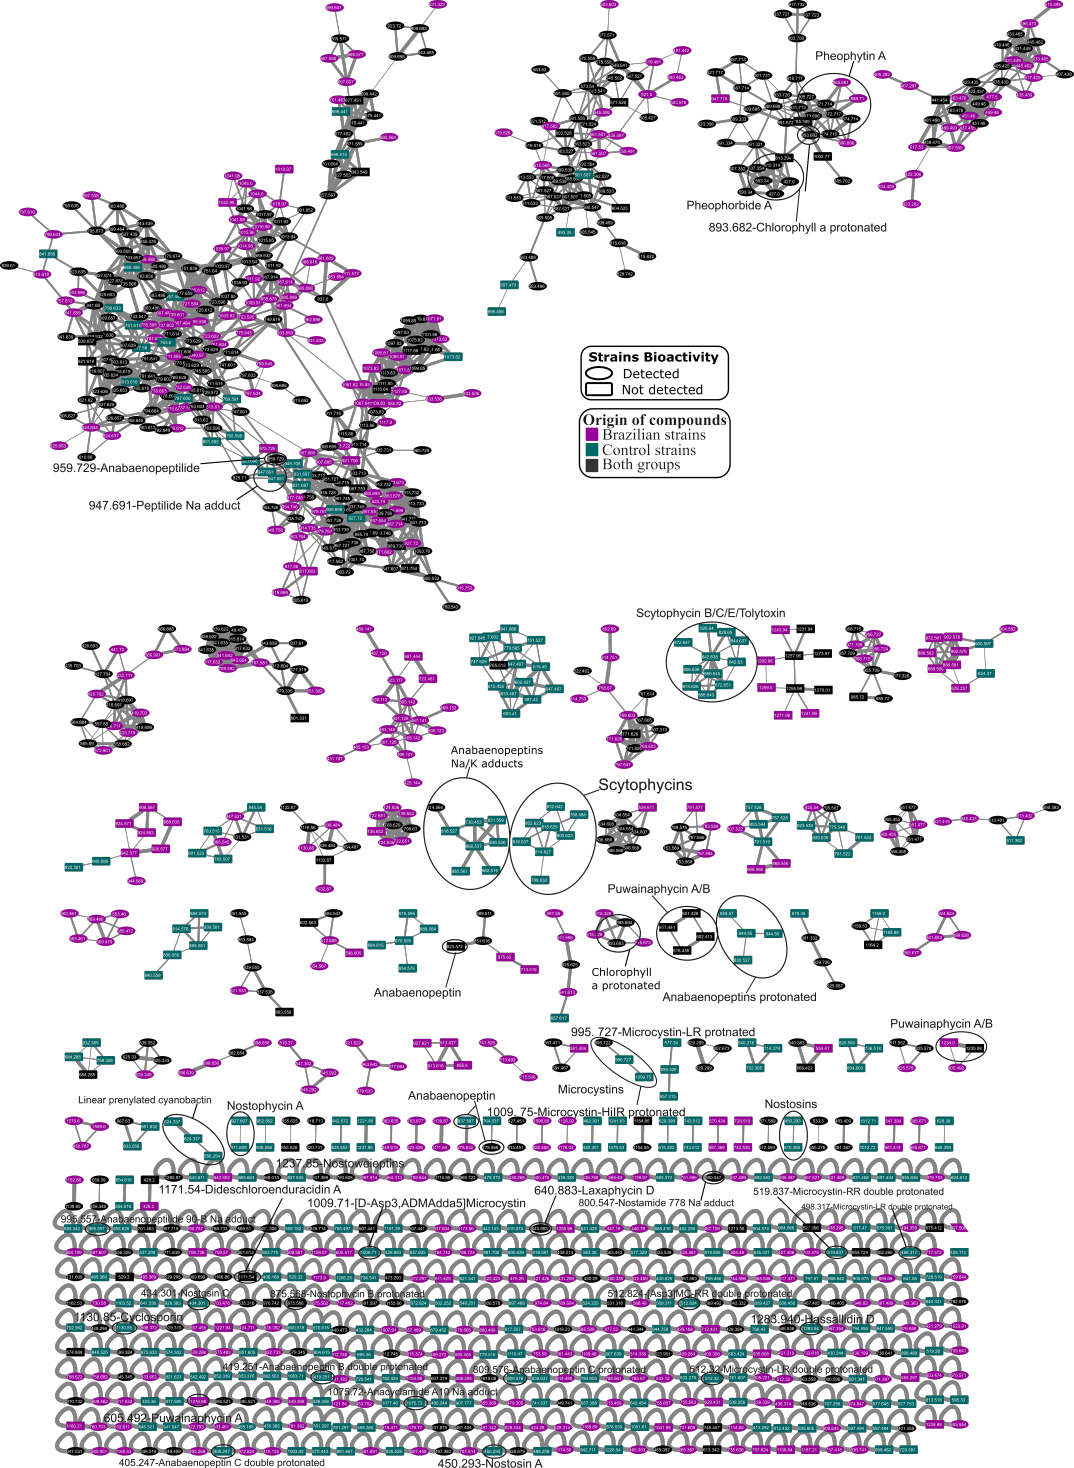

Supplement: s1 [file s1]

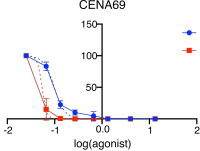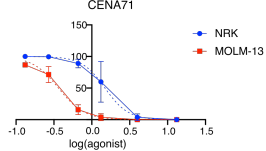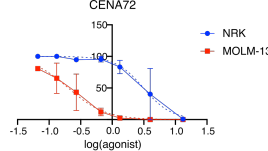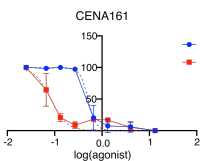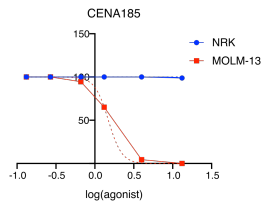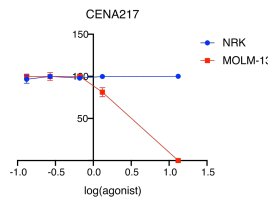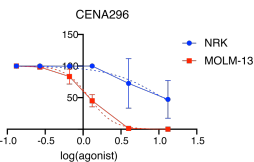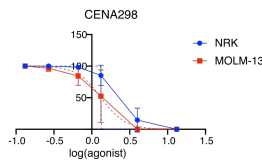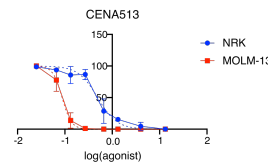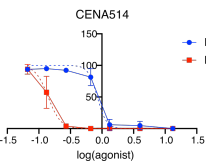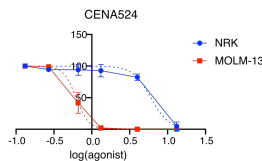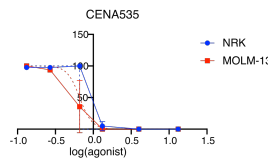

Supplement: s1 [file s1]
